# Supplementary material for: Impact of COVID-19 on the End-of-Life Care of Cancer Patients Who Died in a Korean Tertiary Hospital: A Retrospective Study
Source: PubMed Central journal article supplement — J Hosp Palliat Care. 2022 Dec 1;25(4):150–8. doi: 10.14475/jhpc.2022.25.4.150 (PMC10179996; doi:10.14475/jhpc.2022.25.4.150), 2022-12-01
Supplement: jhpc-25-4-150-supple.pdf [file jhpc-25-4-150-supple.pdf]

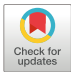

# 국내 3차 병원에서 사망한 암환자들의 임종돌봄에 대한 COVID-19의 영향

신정미, 김예진\*, 유신혜\*, 심진아<sup>†</sup>, 김범석<sup>‡</sup>

서울대학교병원 공공진료센터, \*서울대학교병원 완화의료임상윤리센터, <sup>†</sup>한림대학교 인공지능융합학부, <sup>‡</sup>서울대학교병원 내과

## Impact of COVID-19 on the End-of-Life Care of Cancer Patients Who Died in a Korean Tertiary Hospital: A Retrospective Study

Jeongmi Shin, M.D., Yejin Kim, MSW\*, Shin Hye Yoo, M.D., Ph.D.\*, Jin-Ah Sim, Ph.D.<sup>†</sup> and Bhumsuk Keam, M.D., Ph.D.<sup>‡</sup>

Public Healthcare Center, Seoul National University Hospital,

\*Center for Palliative Care and Clinical Ethics, Seoul National University Hospital, Seoul,

<sup>†</sup>School of AI Convergence, Hallym University, Chuncheon,

<sup>‡</sup>Department of Internal Medicine, Seoul National University Hospital, Seoul, Korea

**Purpose:** Social distancing and strict visitor restrictions at hospitals have been national policies since the onset of the coronavirus disease 2019 (COVID-19) pandemic. This has challenged the concept of a good death in comfort with the opportunity to say goodbye. Little is known about how these measures have influenced end-of-life (EOL) care among cancer patients who die in acute care hospitals. This study examined changes in the EOL care of cancer patients during the COVID-19 pandemic. **Methods:** We retrospectively analyzed 1,456 adult cancer patients who died in 2019 (n=752) and 2020 (n=704) at a tertiary hospital. Data on EOL care—symptom control and comfort care in an imminently dying state, preparation for death, place of death, and aggressive care in the last month—were reviewed. **Results:** The 1,456 patients had a median age of 67 years, and 62.5% were men. Patients who died in 2020 were more likely to experience agitation or delirium before death (17.2% vs. 10.9%), to use inotropes/vasopressors near death (59.2% vs. 52.3%), and to receive cardiopulmonary resuscitation in their last months (16.3% vs. 12.5%) than those who died in 2019. Additionally, the number of deaths in the emergency room doubled in 2020 compared to 2019 (from 7.1% to 14.1%). **Conclusion:** This study suggests that EOL care for cancer patients who died in a tertiary hospital deteriorated during the COVID-19 pandemic. The implementation of medical care at the EOL and the preferred place of death should be discussed carefully in advance for high-quality EOL care.

**Key Words:** COVID-19, Pandemics, Terminal care, Neoplasms, Hospitals

Received May 25, 2022

Revised September 8, 2022

Accepted September 12, 2022

### Correspondence to

Shin Hye Yoo

ORCID:

<https://orcid.org/0000-0001-7473-1082>

E-mail: ifi1024@gmail.com

Bhumsuk Keam

ORCID:

<https://orcid.org/0000-0001-8196-4247>

E-mail: bhumsuk@snu.ac.kr

### Funding/Support

This research was supported by a grant from the Patient-Centered Clinical Research Coordinating Center (PACEN) and COVID-19 Public Health Research through the Korea Health Industry Development Institute (KHIDI), funded by the Ministry of Health & Welfare, Republic of Korea (grant number: HI20C1995, HC20C0005).

## 요약

**목적:** 코로나19 팬데믹 후 사회적 거리두기와 병원의 면회 제한이 국가 정책으로 시행되고 있다. 이러한 방역 조치는 편안한 '좋은 죽음'과 마지막 인사를 어렵게 하고 있다. 그러나 이러한 조치가 급성기 치료 병원에서 사망하는 말기 암환자의 임종돌봄에 어떤 영향을 주는지에 대해 잘 알려진 바가 없다. 본 연구는 코로나19 팬데믹 전 후에 사망한 암환자에서 임종돌봄의 변화가 어떠한지 살펴보고자 한다.

**방법:** 국내 1개 3차 병원에서 2019년(n=752)과 2020년(n=704)에 사망한 성인 암 환자 1,456명을 대상으로 후향적 분석을 시행하였다. 사망 전 증상 조절과 편안함을 위한 치료, 사망에 대한 준비, 사망 장소, 사망 1달 전 공격적 치료에 대한 자료를 조사하였다.

**결과:** 평균 연령은 67세였으며, 남성이 62.5%였다. 2020년 사망 암 환자에서 2019년 사망 암환자에 비해 사망 전 안절부절과 심망 증상이 유의하게 많았고(17.2% vs. 10.9%), 사망 직전 혈압상승제 사용 비율이 유의하게 높았으며(59.2% vs. 52.3%), 사망 1달 전에 심폐소생술을 시행 받은 비율이 높았다(16.3% vs. 12.5%). 또한 응급실에서 사망한 암환자는 2019년에 비해 2020년에 7.1%에서 14.1%로 2배 증가하였다.

**결론:** 본 연구는 코로나19 팬데믹으로 3차 병원에서 사망한 암환자의 임종돌봄의 질이 저하되었음을 시사한다. 높은 임종돌봄의 질을 유지하기 위해 임종기 의료행위의 시행과 환자가 선호하는 사망장소에 대해 사전에 세심하게 논의해야 한다.

**중심단어:** 코로나19, 범유행, 임종돌봄, 약성 신생물, 병원
